# Supplementary material for: DNA mutation detection with chip-based temperature gradient capillary electrophoresis using a slantwise radiative heating system
Source: Royal Society of Chemistry journal article supplement (doi:10.1039/b701649b), 2007-01-01
Supplement: b701649b.pdf [file b701649b.pdf]

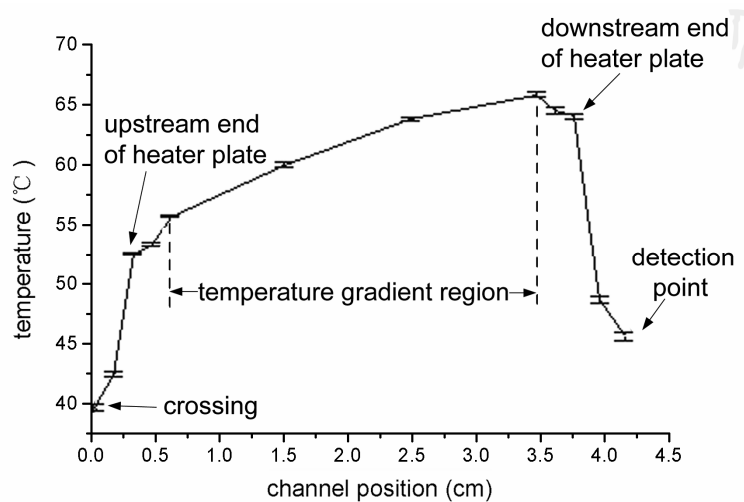

Fig. 1S Temperature distributions along separation channel from channel crossing to detection point. The error bars in Fig. 1S are an indication of temperature reproducibility within the same assembled device (n=5).

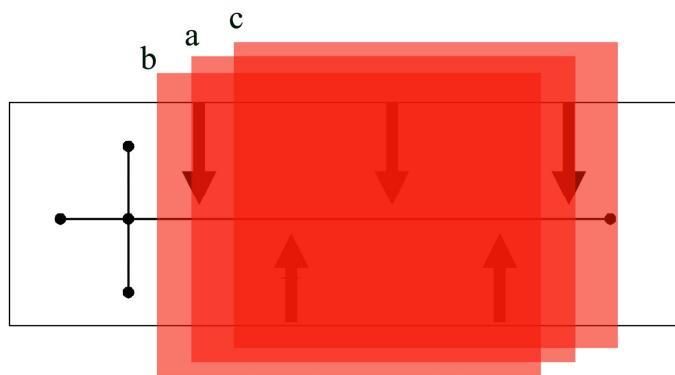

Fig. 2S Measurement of the temperature gradients along separation channel using a special chip. The temperatures along separation channel at any point, using a chip with five holes fabricated as described in Section 2 and shown in Fig. 2, could be measured simultaneously if the aluminum plate were put at position “a”. Data in Figure 1c and Figure 3b were measured by shifting the aluminum plate along the separation channel to obtain more measurement points, e.g. “b” and “c”.
